# Supplementary material for: Macrophage C/EBPδ Drives Gemcitabine, but Not 5-FU or Paclitaxel, Resistance of Pancreatic Cancer Cells in a Deoxycytidine-Dependent Manner
Source: MDPI journal article supplement (doi:10.3390/biomedicines10020219), 2022-01-20
Supplement: s1 [file s1]

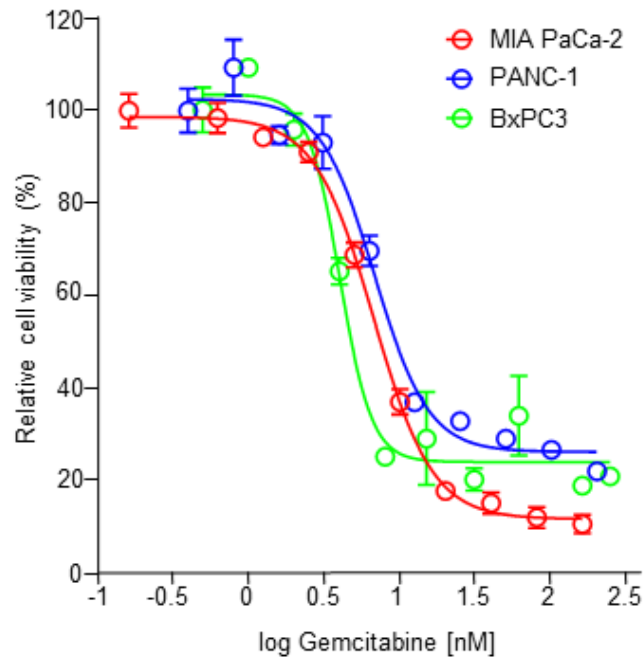

**Supplemental Figure S1:** Dose-response curves of gemcitabine treatment. Cell Mia PaCa-2, BxPc3 and PANC-1 cells at 96 hours of drug exposure. Shown is the mean $\pm$ SEM of a representative experiment performed in sixplo.

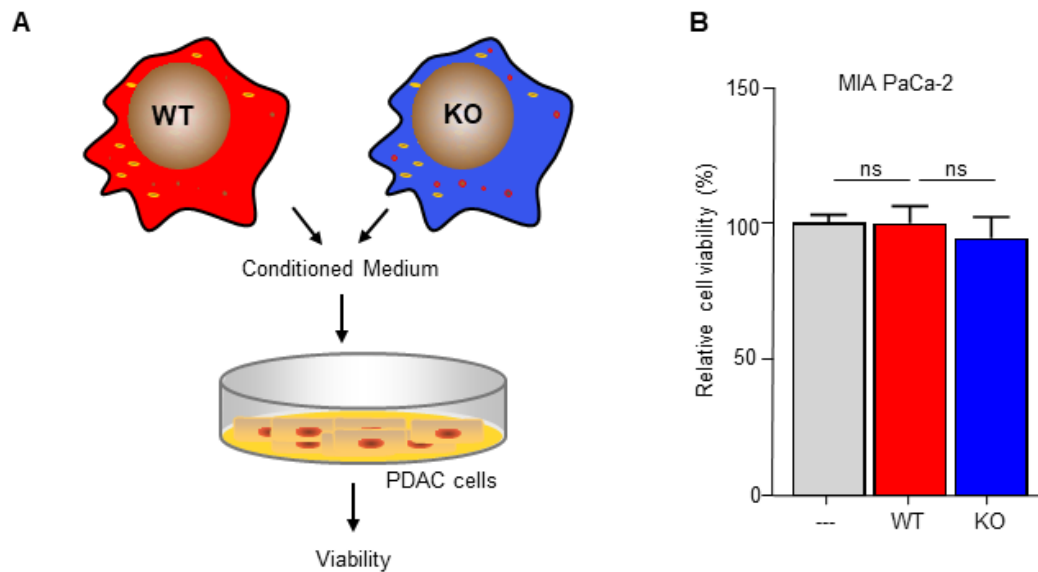

**Supplemental Figure S2:** Conditioned medium does not affect cell viability. (A) Schematic overview of the experimental set up. (B) Viability of Mia PaCa-2 pancreatic cancer cells in control medium (---), conditioned medium obtained from wild type (WT) macrophages and conditioned medium obtained from C/EBP $\delta$  deficient (KO) macrophages. Shown is the mean $\pm$ SEM of an experiment performed in sixplo. ns: not significant.

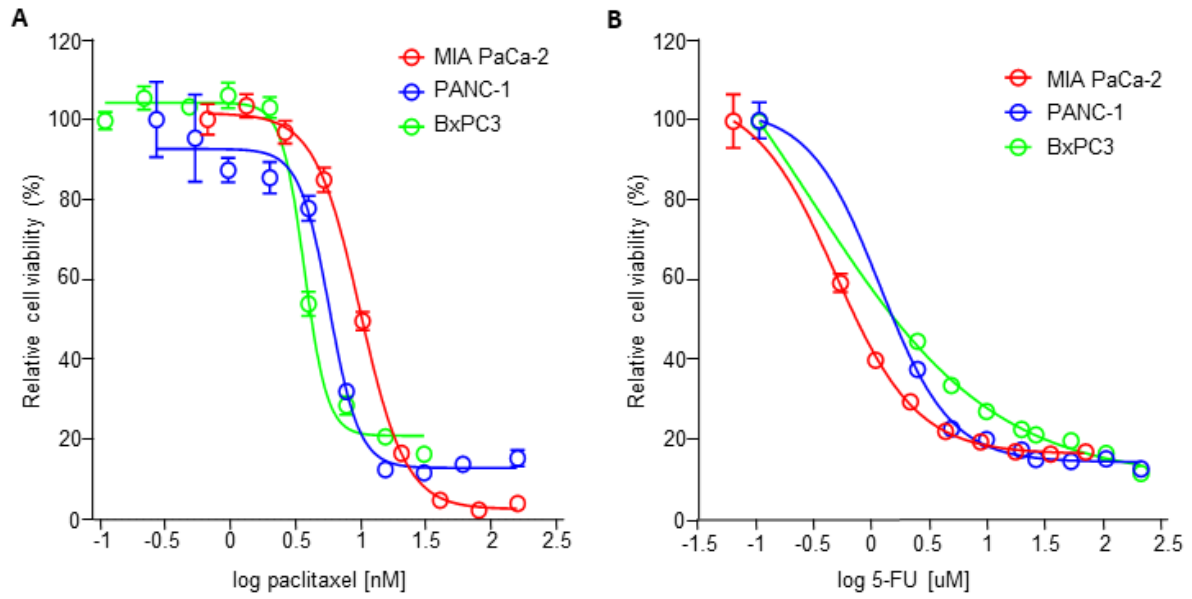

**Supplemental Figure S3:** Dose-response curves of paclitaxel and 5-FU treatment. Cell viability of Mia Paca-2, BxPc3 and PANC-1 cells at 96 hours of paclitaxel (A) and 5-FU (B) exposure. Shown is the mean $\pm$ SEM of representative experiments performed in sixplo.
